# Supplementary material for: Severe Pediatric Neurological Manifestations With SARS-CoV-2 or MIS-C Hospitalization and New Morbidity
Source: PubMed Central journal article supplement (PMC11165382; doi:10.1001/jamanetworkopen.2024.14122), 2024-06-10
Supplement: jamanetwopen-e2414122-s001.pdf [file jamanetwopen-e2414122-s001.pdf]

## Supplemental Online Content

Francoeur C, Alcamo AM, Robertson CL, et al. Severe pediatric neurological manifestations with SARS-CoV-2 or MIS-C hospitalization and new morbidity. *JAMA Netw Open*. 2024;7(6):e2414122. doi:10.1001/jamanetworkopen.2024.14122

**eTable 1.** Comorbidities by Acute SARS-CoV-2 and MIS-C Groups

**eTable 2.** Laboratory, Neurotesting, and Treatment Variables of Patients With and Without Severe Neurologic Manifestations by Acute SARS-CoV-2 and MIS-C Groups

This supplemental material has been provided by the authors to give readers additional information about their work.

**eTable 1.** Comorbidities by Acute SARS-CoV-2 and MIS-C Groups

| Comorbidity                | Acute SARS-CoV-2                         |                 |         | MIS-C                                    |                 |         |
|----------------------------|------------------------------------------|-----------------|---------|------------------------------------------|-----------------|---------|
|                            | Severe Neurologic Manifestation (No (%)) |                 | P value | Severe Neurologic Manifestation (No (%)) |                 | P value |
|                            | Absent (n=2444)                          | Present (n=536) |         | Absent (n=442)                           | Present (n=146) |         |
| Neurologic                 | 398 (16.4)                               | 245 (46.1)      | <0.001  | 26 (5.9)                                 | 17 (11.6)       | 0.02    |
| Cardiovascular             | 227 (9.3)                                | 56 (10.5)       | 0.38    | 16 (3.6)                                 | 8 (5.5)         | 0.32    |
| Respiratory                | 490 (20.1)                               | 129 (24.3)      | 0.03    | 41 (9.3)                                 | 22 (15.2)       | 0.05    |
| Renal or Urologic          | 148 (6.1)                                | 29 (5.5)        | 0.59    | 14 (3.2)                                 | 7 (4.8)         | 0.35    |
| Gastrointestinal           | 359 (14.7)                               | 107 (20.2)      | 0.002   | 15 (3.4)                                 | 5 (3.5)         | 0.96    |
| Hematologic or Immunologic | 281 (11.5)                               | 35 (6.6)        | <0.001  | 16 (3.6)                                 | 8 (5.5)         | 0.32    |
| Metabolic                  | 221 (9.1)                                | 69 (13.0)       | 0.006   | 19 (4.3)                                 | 7 (4.8)         | 0.79    |
| Congenital or Genetic      | 323 (13.3)                               | 105 (19.8)      | <0.001  | 13 (2.9)                                 | 6 (5.1)         | 0.48    |
| Oncological                | 138 (5.7)                                | 30 (5.7)        | 0.97    | 6 (1.5)                                  | 1 (0.7)         | 0.47    |
| Prematurity                | 219 (9.6)                                | 78 (15.9)       | <0.001  | 10 (2.4)                                 | 8 (5.8)         | 0.06    |
| Technological Dependence   | 126 (5.2)                                | 67 (12.6)       | <0.001  | 4 (0.9)                                  | 4 (2.8)         | 0.09    |
| Transplantation            | 59 (2.4)                                 | 10 (1.9)        | 0.44    | 2 (0.5)                                  | 1 (0.7)         | 0.78    |
| Other                      | 241 (10.0)                               | 72 (13.6)       | 0.01    | 29 (6.6)                                 | 5 (3.4)         | 0.43    |

**eTable 2.** Laboratory, Neurotesting, and Treatment Variables of Patients With and Without Severe Neurologic Manifestations by Acute SARS-CoV-2 and MIS-C Groups

| Variable                                            | Acute SARS-CoV-2                         |                                    |         | MIS-C                                    |                                  |         |
|-----------------------------------------------------|------------------------------------------|------------------------------------|---------|------------------------------------------|----------------------------------|---------|
|                                                     | Severe Neurologic Manifestation (No (%)) |                                    | P value | Severe Neurologic Manifestation (No (%)) |                                  | P value |
|                                                     | Absent (n=2,444)                         | Present (n=536)                    |         | Absent (n=442)                           | Present (n=146)                  |         |
| <b>Laboratory</b>                                   |                                          |                                    |         |                                          |                                  |         |
| Highest C-reactive protein, mg/dL (median, [IQR])   | 3.0 [0.6, 13.4]<br>(n=1,304)             | 5.0 [0.6, 18.5]<br>(n=336)         | 0.079   | 20.9 [14.1, 25.6]<br>(n=432)             | 23.6 [12.1, 40.9]<br>(n=139)     | 0.47    |
| Lowest Absolute Lymphocytes (median, [IQR])         | 1,318.0 [532.0, 2730.0]<br>(n=1,878)     | 1,310.0 [438.5, 2640.0]<br>(n=462) | 0.62    | 580.0 [265.5, 995.0]<br>(n=436)          | 483.0 [235.0, 1100.0]<br>(n=144) | 0.36    |
| Lowest Platelets, x 10 <sup>3</sup> (median, [IQR]) | 250.0 [171.0, 331.0]<br>(n=1,966)        | 215.0 [133.0, 302.5]<br>(n=484)    | <0.001  | 143.0 [103.0, 205.0]<br>(n=439)          | 114.0 [73.0, 174.0]<br>(n=144)   | <0.001  |
| Initial Sodium, mMol/L (median, [IQR])              | 138.0 [136.0, 140.0]<br>(n=1,838)        | 138.0 [136.0, 141.0]<br>(n=482)    | 0.10    | 134.0 [132.0, 137.0]<br>(n=353)          | 134.0 [131.0, 136.0]<br>(n=133)  | 0.28    |
| Highest Ferritin ng/mL (median, [IQR])              | 191.0 [85.0, 506.0]<br>(n=593)           | 267.2 (79.0, 816.0)<br>(n=185)     | 0.09    | 612.0 [338.7, 1118.0]<br>(n=425)         | 869 [426.0, 1459.0]<br>(n=139)   | 0.004   |
| <b>Neurotesting</b>                                 |                                          |                                    |         |                                          |                                  |         |
| EEG                                                 | 26 (1.1)                                 | 136 (26.1)                         | <0.001  | 6 (1.4)                                  | 24 (17.1)                        | <0.001  |
| Abnormal EEG <sup>a</sup>                           | 14 (53.8)                                | 103 (75.7)                         | 0.015   | 5 (83.3)                                 | 21 (87.5)                        | 0.79    |
| Brain CT                                            | 86 (3.7)                                 | 153 (30.2)                         | <0.001  | 24 (5.4)                                 | 34 (23.6)                        | <0.001  |
| Abnormal CT <sup>b</sup>                            | 39 (45.3)                                | 69 (45.1)                          | 0.87    | 4 (16.7)                                 | 9 (26.5)                         | 0.34    |
| Brain MRI                                           | 56 (2.4)                                 | 103 (20.6)                         | <0.001  | 13 (2.9)                                 | 26 (17.9)                        | <0.001  |
| Abnormal MRI <sup>c</sup>                           | 28 (50.0)                                | 75 (72.8)                          | 0.003   | 2 (15.4)                                 | 12 (46.2)                        | 0.06    |
| <b>Treatment</b>                                    |                                          |                                    |         |                                          |                                  |         |
| Remdesivir                                          | 209 (8.6)                                | 80 (14.9)                          | <0.001  | 11 (2.5)                                 | 9 (6.2)                          | 0.03    |
| Steroids                                            | 306 (12.5)                               | 118 (22.0)                         | <0.001  | 361 (81.7)                               | 119 (81.5)                       | 0.96    |
| IVIG                                                | 25 (1.0)                                 | 15 (2.8)                           | 0.001   | 392 (88.7)                               | 128 (87.7)                       | 0.74    |

IQR = interquartile range; EEG = electroencephalogram; CT = computed tomography; MRI = magnetic resonance imaging; IVIG = intravenous immunoglobulin; <sup>a</sup> = frequency in those who received an EEG; <sup>b</sup> = frequency in those who received a CT; <sup>c</sup> = frequency in those who received a MRI
