# Supplementary material for: Severe Pediatric Neurological Manifestations With SARS-CoV-2 or MIS-C Hospitalization and New Morbidity
Source: PubMed Central journal article supplement (PMC11165382; doi:10.1001/jamanetworkopen.2024.14122), 2024-06-10
Supplement: jamanetwopen-e2414122-s002.pdf [file jamanetwopen-e2414122-s002.pdf]

## **Data Sharing Statement**

### **Data**

**Data available:** No
